# Supplementary material for: Generation of Gait Events with a FSR Based Cane Handle
Source: Sensors (Basel). 2021 Aug 21;21(16):5632. doi: 10.3390/s21165632 (PMC8402470; doi:10.3390/s21165632)
Supplement: Supplementary file 1 [file sensors-21-05632-s001.zip]

Archive with 13 entries (13 files):
- Participant1.jpg
- Participant10.jpg
- Participant11.jpg
- Participant12.jpg
- Participant2.jpg
- Participant3.jpg
- Participant4.jpg
- Participant5.jpg
- Participant6.jpg
- Participant7.jpg
- Participant8.jpg
- Participant9.jpg
- Supplementary material.pdf
